# Supplementary material for: Virtual Screening, Synthesis and Biological Evaluation of Streptococcus mutans Mediated Biofilm Inhibitors
Source: MDPI journal article supplement (doi:10.3390/molecules27041455), 2022-02-21
Supplement: s1 [file s1]

**Table S1.** Training Dataset collected from literature

| <i>S.No</i> | <i>COMPOUND</i>                                                                                                  | <i>STRUCTURE</i>                                                                     | <i>% INHIBITION</i> |
|-------------|------------------------------------------------------------------------------------------------------------------|--------------------------------------------------------------------------------------|---------------------|
| 1           | (E)-5-((3-(3,4-dihydroxyphenyl)acryloyl)oxy)-3,4-dihydroxycyclohex-1-ene-1-carboxylic acid                       | 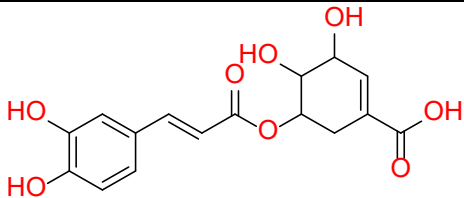   | 40                  |
| 2           | (E)-3-(hydroxy(phenyl)methylene)-6,6-dimethyl-1,5,7-tris(3-methylbut-2-en-1-yl)bicyclo[3.3.1]nonane-2,4,9-trione |    | 48                  |
| 3           | (E)-3-(3,4-dihydroxyphenyl)acrylic acid                                                                          |    | 53.1                |
| 4           | 2-(3,4-dihydroxyphenyl)chromane-3,5,7-triol                                                                      |  | 45.8                |
| 5           | (E)-3-((3-(3,4-dihydroxyphenyl)acryloyl)oxy)-1,4,5-trihydroxycyclohexane-1-carboxylic acid                       |  | 40                  |
| 6           | 4-(3,5-dihydroxyphenoxy)dibenzo[b,e][1,4]dioxine-1,3,6,8-tetraol                                                 |  | 67.8                |

|    |                                                                                                                           |                                                                                      |       |
|----|---------------------------------------------------------------------------------------------------------------------------|--------------------------------------------------------------------------------------|-------|
| 7  | 2-(3,4-dihydroxyphenyl)chromane-3,5,7-triol                                                                               | 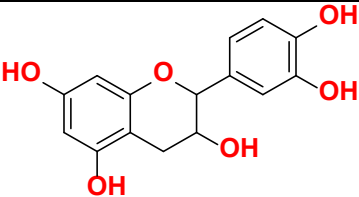   | 40    |
| 8  | 5-methyl-6-(((3,4,5-trimethoxyphenyl)amino)methyl)quinazoline-2,4-diamine                                                 |    | 49.08 |
| 9  | (E)-3-(4-hydroxyphenyl)acrylic acid                                                                                       |    | 76    |
| 10 | 3-((3,4-dihydroxy-5-(hydroxymethyl)tetrahydrofuran-2-yl)oxy)-2-(3,4-dihydroxyphenyl)-5,7-dihydroxy-4H-chromen-4-one       |   | 45    |
| 11 | 2-(3,4-dihydroxyphenyl)-5,7-dihydroxy-3-((3,4,5-trihydroxy-6-methyltetrahydro-2H-pyran-2-yl)oxy)-4H-chromen-4-one         |  | 28    |
| 12 | 3,5,7-trihydroxy-2-(4-hydroxy-3-((3,4,5-trihydroxy-6-(hydroxymethyl)tetrahydro-2H-pyran-2-yl)oxy)phenyl)-4H-chromen-4-one |  | 15    |

|    |                                                                                                                             |                                                                                      |       |
|----|-----------------------------------------------------------------------------------------------------------------------------|--------------------------------------------------------------------------------------|-------|
| 13 | 2-(3,4-dihydroxyphenyl)-5-hydroxy-3,7-bis((3,4,5-trihydroxy-6-(hydroxymethyl)tetrahydro-2H-pyran-2-yl)oxy)-4H-chromen-4-one | 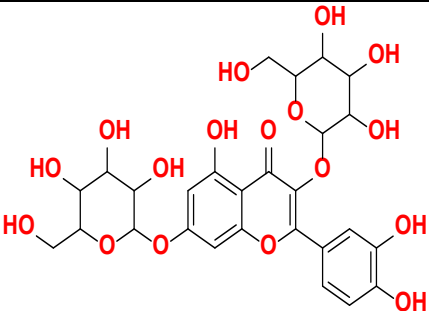   | 16    |
| 14 | 3,5,7-trihydroxy-2-(3,4,5-trihydroxyphenyl)-4H-chromen-4-one                                                                |    | 28    |
| 15 | 5,7-dihydroxy-2-(4-hydroxyphenyl)-4H-chromen-4-one                                                                          |    | 90    |
| 16 | 5,6,7-trihydroxy-2-phenyl-4H-chromen-4-one                                                                                  |   | 50.1  |
| 17 | 2-(3,4-dihydroxyphenyl)-3,5,7-trihydroxy-4H-chromen-4-one                                                                   |  | 11-14 |

**Table S2.** The inactive compounds from literature

| S.No | IUPAC NAME                                                                                                    | STRUCTURE |
|------|---------------------------------------------------------------------------------------------------------------|-----------|
| 1.   | (2S,3R,4R,5S,6R)-2-(3-((E)-4-hydroxy-3-methoxystyryl)phenyl)-6-(hydroxymethyl)tetrahydro-2H-pyran-3,4,5-triol |           |
| 2.   | 4,4'-(ethane-1,2-diyl)dianiline                                                                               |           |
| 3.   | 1,2 diphenyl ethane                                                                                           |           |
| 4.   | (E)-1.2-diphenylethene                                                                                        |           |
| 5.   | (E)-1-(2,4-dihydroxyphenyl)-3-phenylprop-2-en-1-one                                                           |           |
| 6.   | (E)-1-(2,4-dihydroxyphenyl)-3-(2-hydroxyphenyl)prop-2-en-1-one                                                |           |
| 7.   | (E)-3-(2-hydroxyphenyl)-1-(3-hydroxyphenyl)prop-2-en-1-one                                                    |           |
| 8.   | (E)-1-(3,5-bis(dimethylamino)-4-hydroxyphenyl)-3-(4-methoxyphenyl)prop-2-en-1-one                             |           |

|    |                                                                          |                                                                                     |
|----|--------------------------------------------------------------------------|-------------------------------------------------------------------------------------|
| 9. | (E)-1-(3,4-dimethoxyphenyl)-3-(3-hydroxy-4-methoxyphenyl)prop-2-en-1-one | 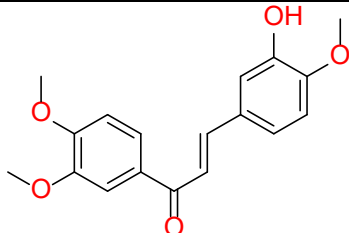 |
|----|--------------------------------------------------------------------------|-------------------------------------------------------------------------------------|

**Table S3.** Benchmarking of MOE and Autodock software.

| Software        | Number of poses | RMSD (Å) | Score (kcal/mol) |
|-----------------|-----------------|----------|------------------|
| <b>MOE</b>      | 1               | 1.56     | -8.60            |
|                 | 2               | 1.57     | -8.50            |
|                 | 3               | 2.27     | -8.90            |
|                 | 4               | 2.37     | -8.60            |
|                 | 5               | 4.80     | -9.04            |
| <b>Autodock</b> | 1               | 2.52     | -8.60            |
|                 | 2               | 2.78     | -8.50            |
|                 | 3               | 3.27     | -8.30            |
|                 | 4               | 3.47     | -8.20            |
|                 | 5               | 3.86     | -8.20            |

**Table S4.** Results of the cytotoxicity prediction of the compounds using Pro Tox -11 webserver.

| Compounds | Prediction | Probability |
|-----------|------------|-------------|
| A3566     | Inactive   | 0.57        |
| A3989     | Inactive   | 0.67        |
| A4554     | Inactive   | 0.69        |
| A6996     | Inactive   | 0.59        |
| A12324    | Inactive   | 0.77        |
| A13419    | Inactive   | 0.56        |

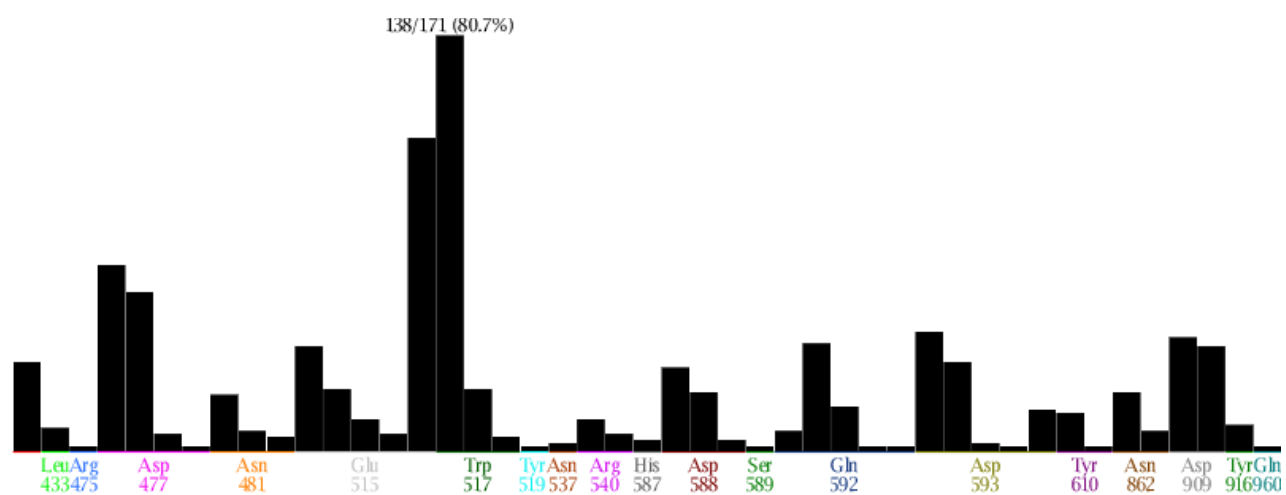

**Figure S1.** PLIF analysis of the virtual hits.
